# Supplementary material for: ‘HypothesisFinder:’ A Strategy for the Detection of Speculative Statements in Scientific Text
Source: PLoS Comput Biol. 2013 Jul 25;9(7):e1003117. doi: 10.1371/journal.pcbi.1003117 (PMC3723489; doi:10.1371/journal.pcbi.1003117)
Supplement: Dataset S2 — Hypothesis related to Mild stage of AD extracted by using HypothesisFinder in combination with Alzheimer's disease ontology (ADO) and Human gene and protein dictionary within SCAIView. (XLS) [file pcbi.1003117.s002.xls]

## Sheet: 1
	Mild stage hypotheses
	Explicit Evidence:Disease stage is exclusively mentioned in the sentence
	Implicit Evidence"Disease stage if inferred by reading the abstract
Gene name	Hypothesis	Number of hypotheses for each gene	PubMed ID	Publication date
APP	This review article describes recent findings that may lead to the development of a strategy for AD prevention by decreasing the cellular cholesterol level, and also focuses on the impact of Abeta on cholesterol metabolism in AD and mild cognitive impairment (MCI), which may result in promotion of the amyloid cascade at later stages of the AD process.	29	12668899	2003-02-01
	Our findings support the notion that CSF tau and Abeta(1-42) may be useful biomarkers in the early identification of AD in MCI subjects.		14699432	2004-07-01
	These observations suggest that neither memory decline nor Abeta deposition are part of normal ageing and likely represent preclinical AD		18343463	1905-06-30
	TgCRND8 mice at 7 months of age exhibited advanced deterioration in all behavioral tasks studied, suggesting that accelerated Abeta accumulation and the predominance of Abeta42 species may account for the pronounced cognitive deficits observed in TgCRND8		17380553	2007-07-01
	These data suggest that distinct changes in Abeta occur throughout the progression of AD, and that elevations in Abeta42 occur at an early, clinically defined stage.		17651976	2007-09-01
	There is growing evidence that mild cognitive impairment in early AD (Alzheimer's disease) may be due to synaptic dysfunction caused by the accumulation of non-fibrillar, oligomeric Abeta (amyloid beta-peptide), long before widespread synaptic loss and neurodegeneration occurs		17956317	2007-11-01
	These observations suggest that Abeta deposition is not part of normal ageing, supporting the hypothesis that Abeta deposition occurs well before the onset of symptoms and is likely to represent preclinical AD.		18690556	2008-08-01
	In the course of cognitive deterioration leading to Alzheimer's disease (AD) the increase of amyloid beta (Abeta42) in cerebrospinal fluid or plasma might be an initial event		18155247	2008-09-01
	Moreover, Abeta may play a role in prediction the conversion of MCI to AD.		19519314	2009-06-01
	Abeta models of AD strongly support the notion that oxidative stress induced by Abeta may be a driving force in AD pathogenesis.		19288120	2009-07-01
	Abeta models of AD strongly support the notion that oxidative stress induced by Abeta may be a driving force in AD pathogenesis.		19288120	2009-07-01
	The markers of oxidative stress have been localized in the brain regions of AD and MCI that show pathological hallmarks of this disease, suggesting the possible role of Abeta in the initiation of the free-radical mediated process and consequently to the build up oxidative stress and AD pathogenesis.		19777328	2009-10-01
	Recent evidence suggests an association of beta-amyloid (Abeta) with vascular risk factors and the medications to treat them, which could potentially obfuscate the usefulness of Abeta for prediction of mild cognitive impairment (MCI) or Alzheimer disease (AD). I		19707525	2009-12-01
	The high Abeta load in the brain measured by PET in patients with mild cognitive impairment that later will convert to AD suggests early, significant, ongoing pathological processes prior to cognitive impairmen		20197692	2010
	Early cognitive deficit characteristic of early Alzheimer's disease seems to be produced by the soluble forms of beta-amyloid protein.		19294646	2010-01-01
	Pathological, genetic, biochemical and pharmacological studies support the hypothesis that brain accumulation of oligomeric species of beta-amyloid (Abeta) peptides may cause Alzheimer's disease (AD).		19939231	2010-02-01
	The absence of a change in plasma Abeta in incipient AD, despite the marked change in CSF, may be explained by the lack of a correlation between the levels of Abeta(1-42) in CSF and plasma		18486992	2010-03-01
	Alzheimer's disease (AD) involves a complex pathological cascade thought to be initially triggered by the accumulation of beta-amyloid (Abeta) peptide aggregates or aberrant amyloid precursor protein (APP) processing.		20437209	2011-06-10
	Therefore, amyloid-beta may be useful as a biomarker of AD, not only for the very early diagnosis but also for monitoring the therapeutic effect of disease-modifying agents that may reduce the amount of deposited amyloid-beta in the brains of patients with AD		20675880	2010-07-01
	Several lines of evidences from PiB-PET studies have suggested that the accumulation of amyloid-beta starts during the preclinical stage of Alzheimer disease (AD) and reaches the plateau phase before or during the mild cognitive impairment (MCI) stage.		20675880	2010-07-01
	Therefore, the finding of faster progression of brain atrophy in the presence of lower Abeta(1-42) levels and higher tau levels supports the hypothesis that CSF Abeta(1-42) and tau are measures of early AD pathology.		20570401	2010-08-01
	Beta-amyloid (Abeta) deposition seems almost inevitable with advanced age, amyloid burden is similar at all ages in AD, and secondary factors or downstream events appear to play a more direct role than total beta amyloid burden in hippocampal atrophy and cognitive decline.		20472326	2010-08-01
	The oxidative stress observed in brains of subjects with AD and MCI may be due, either fully or in part, to increased free radicals mediated by amyloid-beta peptide (Abeta		20648652	2010-09-01
	These results indicate that memory performance is related to Aβ(1-42) levels in SMC, while it is associated with tau in the prodromal stage of the disease		21098971	2011
	This suggests that in the continuum from healthy aging to AD, memory performance is first related with Aβ(1-42) levels and then with t-tau or p-tau, before becoming independent of biomarker levels in the dementia stage.		21098971	2011
	Among them, recent studies indicate that the pyroglutamate modification of Aβ (pE(3)Aβ) catalyzed by glutaminyl cyclase might play an important role in the pathogenesis of AD.		22064070	2012
	These findings suggest that chronic mild stress accelerates the onset of cognitive impairment and produces an increase in hippocampal amyloid-β and phospho-tau levels on a background of AD susceptibility.		22045482	2012
	Several lines of evidence suggest that the progressive concentration and subsequent aggregation and accumulation of Aβ play a fundamental role in the disease progress.		22236121	2012
	The novel addition offered here is the speculation that low-abundance, gain-of-function somatic mutations of the amyloid precursor protein may be part of the triggering mechanism.		21205781	2011-01-01
CSF1	We suggest that M-CSF, thus generated, contributes to the pathogenesis of AD, and that M-CSF in cerebrospinal fluid might provide a means for monitoring neuronal perturbation at an early stage in AD	4	9144231	1997-05-01
	The results suggest that serum M-CSF level may provide a convenient and sensitive means for the early diagnosis of Alzheimer's disease.		12905639	2002-06-01
	In conclusion, our data indicate that M-CSF in CSF could be a putative biomarker for MCI.		20455868	2010-08-01
	Therefore, the finding of faster progression of brain atrophy in the presence of lower Abeta(1-42) levels and higher tau levels supports the hypothesis that CSF Abeta(1-42) and tau are measures of early AD pathology.		20570401	2010-08-01
APOE	These studies indicate that APOE is an important risk factor for AD, and in patients with a mild cognitive impairment, APOE may be useful in predicting who is likely to progress to dementia.	18	8993485	1996-12-01
	It is concluded that CSF measures of both apoE and tau may reflect an intimate relationship between these two proteins in AD and could prove useful in monitoring the progression of this condition.		9223597	1997-06-01
	These two lines of evidence suggest that ApoE, specifically the epsilon 4 allele, plays an important role in the development of AD.		9929677	1998-11-01
	ApoE transcription was increased approximately 3-fold in the hippocampus of 17-month-old APPV717F mice, suggesting a region-specific upregulation of apoE transcription in the brains of APPV717F mice to compensate for apoE sequestered with fibrillar A beta.		11338204	2001-05-01
	The observed influence of the apolipoprotein E epsilon4 (APOE4) allele on CSF 24S-hydroxycholesterol concentrations with a gene-dosage effect suggests the existence of a link between the AD risk factor APOE4 and CNS cholesterol metabolism.		11755458	2002-02-01
	These results suggested that the decreased olfactory identification in MCI may be a marker for the early diagnosis of Alzheimer's disease, and ApoE genotype may be part of the basis of olfactory identification decline		12231459	2002-09-01
	The presence of the APOE epsilon4 allele is associated with impaired memory functioning in both middle-aged and old subjects with MCI, although the memory function affected varies with age. Its effect on memory function may be dependent on underlying AD pathology in elderly subjects, but not in middle-aged subjects.		18617739	1905-06-30
	The presence of the Apo E4 allele may influence the rate of cognitive deterioration, particularly in subjects with mild AD.		16634464	2006-04-01
	The apparent inadequacies of ApoE epsilon4 in these roles may explain the increased risk of AD in subjects carrying one or more APOE epsilon4 alleles		16786033	2006-08-01
	A high frequency of the APOE epsilon4 allele has been found in patients with AD and they seem to have a higher risk of developing the disease.		17132969	2006-12-01
	The levels of apoE in cerebrospinal fluid were also correlated to the levels of Tau and the possibility is discussed that the level of apoE in cerebrospinal fluid may be used as a marker of neurodegeneration.		17822846	2007-09-01
	The levels of apoE in cerebrospinal fluid were also correlated to the levels of Tau and the possibility is discussed that the level of apoE in cerebrospinal fluid may be used as a marker of neurodegeneration.		17822846	2007-09-01
	Memory problems are a main feature of mild cognitive impairment (MCI) and may be related to the apolipoprotein E (APOE) epsilon4 allele.		18617739	2008-10-01
	These findings suggest that fibrillar Abeta burden in cognitively normal older people is associated with APOE epsilon4 gene dose, the major genetic risk factor for AD.		19346482	2009-04-01
	whether there are regionally specific longitudinal changes in rCBF in APOE epsilon4 carriers that might be related to its well-established role as a genetic risk factor for Alzheimer disease.		20065135	2010-01-01
	Accelerated rates of decline in brain function in APOE epsilon4 carriers may contribute to an increased risk for Alzheimer disease and a younger age at onset		20065135	2010-01-01
	In this study, we tested the hypothesis that there would be an association among rates of regional brain atrophy, the CSF biomarkers Abeta(1-42), t-tau, and p-tau(181p) and apolipoprotein E (ApoE) epsilon4 status, and that the pattern of this association would be diagnosis-specific		20570401	2010-08-01
	whether whole brain atrophy and apolipoprotein E (APOE) genotype are associated with the rate of functional decline in MCI.		20813341	2010-09-01
PRX	In the present study, compared to controls, we observed in hippocampus from subjects with MCI a significantly decreased level of PSD95, a key synaptic protein, and also decreased levels of two proteins associated with PSD95, the N-methyl-D-aspartate receptor, subunit 2A (NR2A) and the low-density lipoprotein receptor-1 (LRP1). PSD95 and NR2A are involved in long-term potentiation, a key component…	1	19774677	2010-02-01
GRIN2A	The identified novel mechanism through which Aβ initiates synaptic dysfunction suggests that selective enhancement of NR2A activity and/or reduction of NR2B activity can halt the manifestation of a key early-stage event in AD.	2	20847396	2010-05-01
	In the present study, compared to controls, we observed in hippocampus from subjects with MCI a significantly decreased level of PSD95, a key synaptic protein, and also decreased levels of two proteins associated with PSD95, the N-methyl-D-aspartate receptor, subunit 2A (NR2A) and the low-density lipoprotein receptor-1 (LRP1). PSD95 and NR2A are involved in long-term potentiation, a key component…		19774677	2010-02-01
MAPT	It is concluded that CSF measures of both apoE and tau may reflect an intimate relationship between these two proteins in AD and could prove useful in monitoring the progression of this condition	17	9223597	1997-06-01
	our results suggest that the pathogenic steps of AD may be at the stage that finally leads to an accumulation of abnormally phosphorylated tau and neuron death, at least in some brain areas, when MCI patients present with the earliest detectable clinical symptoms of dementia.		11031097	2000-11-01
	These data indicate that phosphorylated tau pathology in the ventromedial temporal lobe develop prior to the onset of clinical dementia and their presence is associated with cognitive impairment, particularly impairment of episodic memory.		11835374	2002-02-01
	Our data indicate that an increased p-tau(231) level is a potential risk factor for cognitive decline in patients with MCI.		12196665	2002-08-01
	Studies have found high levels of tau phosphorylated at Threonine 231 and/or Serine 199 in AD but not in other causes of dementia, in depression or in healthy elderly controls. Of particular interest, the test appears equally valid in cases of early AD as in moderate or late stages and may also be of use in predicting future decline in subjects with mild cognitive impairment.		12766916	2003-05-01
	Our findings support the notion that CSF tau and Abeta(1-42) may be useful biomarkers in the early identification of AD in MCI subjects.		14699432	2004-07-01
	The CSF markers tau, Abeta42 forms, and P-tau181P, when used as adjuncts to clinical diagnosis, have the potential to help identify AD pathology and could be a valuable asset for early AD diagnosis.		16020497	2005-09-01
	Since the presence of pathological levels in >or=2 cerebrospinal fluid (CSF) biomarkers; amyloid protein (Abeta42), total tau (h-tau) and phospho-tau (p-tau) seems to reliably identifying MCI subjects converting to AD, we report our experience in a routine clinical setting		16274728	2006-02-01
	This nuclear hypertrophy may represent an early neuronal reaction to Abeta or Tau, or a compensatory mechanism which forestalls the progression of AD and allows the brain to resist the development of dementia		17599696	2007-10-01
	Both, an increase in p tau levels and a decrease in cerebrospinal fluid APPs alpha, seem to refer to relevant but functionally different processes in the development of mild cognitive impairment and dementia of Alzheimer's type		19073834	2009-03-01
	High tau protein in combination with low amyloid beta levels has a high sensitivity (80%) and specificity (90%) for Alzheimer's disease (AD) against normal aging and can predict conversion of mild cognitive impairment to AD.		19475759	2009-06-01
	Tau and Abeta42 in CSF seem to reflect the underlying disease state in both early and late stages of AD.		19609443	2009-07-01
	These results firstly suggest that the risk of mild cognitive impairment is influenced by tau protein gene variations and that mild cognitive impairment shares a common genetic background with Alzheimer's disease.		20157246	2--10
	This signature appears to predict conversion from MCI to AD. Data fusion efforts across ADNI Cores generated a model for the temporal ordering of AD biomarkers which suggests that Abeta amyloid biomarkers become abnormal first, followed by changes in neurodegenerative biomarkers (CSF tau, F-18 fluorodeoxyglucose-positron emission tomography, magnetic resonance imaging) with the onset of clinical …		20451871	2010-05-01
	This signature(tau) appears to predict conversion from MCI to AD. Data fusion efforts across ADNI Cores generated a model for the temporal ordering of AD biomarkers which suggests that Abeta amyloid biomarkers become abnormal first, followed by changes in neurodegenerative biomarkers (CSF tau, F-18 fluorodeoxyglucose-positron emission tomography, magnetic resonance imaging) with the onset of clin…		20451871	2010-05-01
	Therefore, the finding of faster progression of brain atrophy in the presence of lower Abeta(1-42) levels and higher tau levels supports the hypothesis that CSF Abeta(1-42) and tau are measures of early AD		20570401	2010-08-01
	The study suggests that aMCI is characterised by memory impairment and associated with SNPs in three systems relating to the pathogenesis of AD-those of the amyloid cascade, tau and cholesterol metabolism pathways.		22911757	1905-07-04
PSEN1	These findings demonstrate an adverse effect of a disease-causing PS1 mutation in oligodendrocytes, and suggest a mechanism responsible for white matter damage in AD and a contribution of such damage to cognitive impairment.	2	12665676	2--3
	Our results suggest that PS-1 mutations may contribute to the cognitive impairment in AD by causing a nontoxic suppression of the cholinergic phenotype.		9278388	2007-09-01
CHAT	These data suggest that cholinergic neurons, and the coexpression of ChAT and VAChT, are relatively preserved in early stages of AD.	7	10421878	1999-09-01
	The upregulation in frontal cortex and hippocampal ChAT activity could be an important factor in preventing the transition of MCI subjects to AD.		11835370	2002-02-01
	Conversely, in LBV, loss of ChAT activity is already prominent in the earliest stages of the illness, suggesting that cholinergic replacement therapy may be more effective in LBV than in AD, especially in mild-stage disease.		12365882	2002-10-01
	The reduction in ChAT activity in the PVC of mild to moderate AD, but not in MCI, might serve to distinguish between clinical and preclinical forms of the disease		15767507	2005-03-01
	Furthermore, the stability of cholinergic enzyme activity in mAD is likely the result of a biochemical up-regulation of ChAT protein or enzyme activity levels in the SFC, compensating for decreased regional cholinergic fibers and axon varicosities.		17846271	2007-09-01
	A functional single nucleotide polymorphism (2384 G/A) of ChAT was proposed to be associated with AD risk and age of onset		18562794	2--8
	It has been hypothesized that choline acetyltransferase (ChAT) activity might be associated with cognitive impairment in Alzheimer's disease (AD)		18562794	2--8
ACHE	Our own studies have identified glycosylated isoforms of acetylcholinesterase (Glyc-AChE) and butyrylcholinesterase (Glyc-BuChE) that are increased in AD CSF. Glyc-AChE is increased in APP (SW) Tg2576 transgenic mice prior to amyloid plaque deposition, which suggests that Glyc-AChE may be an early marker of AD.	4	12704813	2003-05-01
	These results suggest that low cortical acetylcholine esterase activity may be an indicator of impending dementia in patients with mild cognitive impairment.		16110265	2005-09-01
	Peripheral or dual binding site inhibitors of AChE may simultaneously alleviate the cognitive and behavioral deficits in Alzheimer's disease (AD) patients and, more importantly, act as disease-modifying agents delaying amyloid plaque formation.		18322376	2--8
	The results showed that piperine at all dosage range used in this study significantly improved memory impairment and neurodegeneration in hippocampus. The possible underlying mechanisms might be partly associated with the decrease lipid peroxidation and acetylcholinesterase enzyme		20034530	2010-03-01
BACE1	The assessment of BACE 1 in CSF may provide a sensitive measure to detect in vivo alterations in the amyloidogenic processing potentially modified by the ApoE genotype.	4	18334538	2008-05-01
	Therefore, CSF-based detection of BACE1 levels and activity might be valuable in aiding early detection and prediction, particularly in preclinical or even presymptomatic subjects who are at risk of AD.		18609117	2009-03-01
	beta-site APP cleaving enzyme (BACE1) is thought to be the major beta-secretase involved in Abeta production in the brain		20164582	2010-04-01
	These data suggest that increased BACE1 activity in CSF relates to AD pathology in the brain.		20164582	2010-07-01
NGF	A local, acute increase in the availability of acetylcholine rescues these synaptic plasticity deficits, thus indicating that a cholinergic system mediates the impairment of cortical plasticity at this early stage of the neurodegenerative process triggered by NGF neutralization	5	11918663	2002-03-01
	These findings demonstrate that proNGF levels increase during the preclinical stage of AD and may reflect an early biological marker for the onset of AD.		15217092	2004-06-01
	Alterations in NGF and its receptors within the cholinotrophic NB system in early AD suggest that NGF-mediated cell signaling is required for the longterm survival of these neurons.		15835262	2005-04-01
	Given that proNGF is known to be upregulated in AD patients a dysregulation in the maturation or degradation of mature NGF might explain the preferential vulnerability of the cholinergic system in the AD pathology.		17908036	2007-09-01
	These findings suggest that a reduction in mNGF as a consequence of MMP-9-mediated degradation may in part underlie the pathogenesis of cognitive deficits in mild cognitive impairment and AD		19915485	2009-12-01
BDNF	Cell culture findings are presented which indicate that brain-derived neurotrophic factor (BDNF), and other neurotrophins with activity on the TrkB tyrosine kinase receptor, increase mRNA levels and biochemical activity of enzymes of the glycolytic pathway in brain cells.	7	8637432	1996-02-01
	These results demonstrate that the reduction of both forms of BDNF occurs early in the course of AD and correlates with loss of cognitive function, suggesting that proBDNF and BDNF play a role in synaptic loss and cellular dysfunction underlying cognitive impairment in AD.		15935057	2005-06-01
	This study suggests that reduced BDNF levels may play a role in the pathophysiology of aMCI, and the BDNF gene Val66Met polymorphism may not be an important factor in susceptibility to aMCI.		18505307	2008-07-01
	Upregulation of BDNF might be part of a neuroprotective effect of lithium in AD patients.		19276559	2009-02-01
	Collectively, these findings indicate that BDNF exerts substantial protective effects on crucial neuronal circuitry involved in Alzheimer's disease, acting through amyloid-independent mechanisms.		19198615	2009-03-01
	Our findings indicate that BDNF serum levels increase in MCI and AD		20205668	2010-02-01
	These results suggested that the BDNF gene may significantly influence executive dysfunction, including inhibition tasks, among patients with mild-stage AD.		22699449	1905-07-04
ENO2	The findings suggest that serum levels of S100B may be a marker for brain functional condition and serum NSE levels may be a marker for morphological status in AD.	1	20105309	2010-01-01
NGFR	The stability of cortical sortilin levels in the face of stable p75(NTR), increased proNGF, and reduced TrkA levels may favor pro-apoptotic proNGF:p75(NTR):sortilin trimeric interactions within the cortex during the earliest stages of AD.	1	20085800	2010-03-01
SERPINA3	Our study strongly suggests that ACT is biologically active in amyloid plaques from an early stage.	5	1927277	1991-02-01
	These results suggest that alpha 1-antichymotrypsin is associated with the early to late stages of amyloid deposition and senile plaque formation in senile demential of the Alzheimer type.		1702930	1991-01-01
	Biochemical and genetic studies indicate that the inflammatory proteins, apolipoprotein E (ApoE) and alpha(1)-antichymotrypsin (ACT) are important in the pathogenesis of Alzheimer's disease (AD)		15312961	2004-10-01
	We conclude that APOE is a risk gene for amnestic MCI and that ACT and CHRNA7 may act in these patients as modifier genes for the time of progression to AD.		18078695	2009-08-01
	We have investigated whether the -86 C/T promoter polymorphism in CHRNA7 gene, the signal peptide polymorphism of the alpha1-antichymotripsin (ACT) gene or the APOE genotype are associated with an increased risk of mild cognitive impairment (MCI) or affect the risk of evolution to Alzheimer's disease (AD).		18078695	2009-08-01
NTRK1	Individuals with MCI and AD displayed significant reductions in trkA mRNA relative to aged-matched controls, indicating that alterations in trkA gene expression occur early in the disease process.	4	11494257	2001-08-01
	The selective reduction of cortical TrkA levels relative to p75(NTR) may have important consequences for cholinergic NB function during the transition from MCI to AD.		15455399	2004-10-01
	Thus, trk defects may be a molecular marker for the transition from no cognitive impairment (NCI) to MCI, and from MCI to frank AD.		16539663	2006-04-01
	The stability of cortical sortilin levels in the face of stable p75(NTR), increased proNGF, and reduced TrkA levels may favor pro-apoptotic proNGF:p75(NTR):sortilin trimeric interactions within the cortex during the earliest stages of AD		20085800	2010-03-01
CDK5	These findings suggest that this kinase might be involved in the formation of NFTs at a relatively early stage in the neocortex.	4	9666145	1998-06-01
	These findings suggest that cdk5 is activated by p67 at the early stage of NFT formation and accelerates NFT formation.		10620662	2000-01-01
	A chemical genetic screen revealed that deregulated cyclin-dependent kinase 5 (Cdk5) may cause oxidative stress by compromising the cellular anti-oxidant defense system.		18691386	2008-10-01
	Using novel Cdk5 modulators, we show the mechanism by which Cdk5 can induce oxidative stress in the disease's early stage and cell death in the late stage.		18691386	2008-10-01
IDE	The study tentatively suggests that interventions aimed at promoting membrane-bound IDE activities in the brain of MCI cases may help to prevent the onset and possibly the progression into AD through mechanisms involving the clearance of monomeric Abeta from the brain.	1	16769157	2007-06-01
GSK3B	In conclusion, we corroborate previous evidence of increased GSK activity in peripheral tissues of patients with MCI and AD, and further propose that platelet GSK may be an alternative peripheral biomarker of this abnormality, provided samples are adequately handled in order to preclude platelet activation.	1	20576277	2011-02-01
SLC30A1	Serum amyloid P component (SAP), present in amyloid-beta (Abeta) plaques in Alzheimer's disease (AD), may protect Abeta deposits against proteolysis, thereby promoting plaque formation.	3	19052452	2--8
	Overall, these data suggest a significant decrease of serum Zn in men with MCI, may explain the loss of ZnT-1 observed in previous studies and suggest there may be more pronounced sex differences in MCI than were previously recognized		18997297	2008-11-01
	Our previous studies demonstrate alterations of zinc (Zn) transporter proteins ZnT-1, ZnT-4 and ZnT-6 in vulnerable brain regions of subjects with mild cognitive impairment (MCI), and early and late stage Alzheimer's disease (AD), suggesting disruptions of Zn homeostasis may play a role in the pathogenesis of AD.		19371353	2010-03-01
APCS	Serum amyloid P component (SAP), present in amyloid-beta (Abeta) plaques in Alzheimer's disease (AD), may protect Abeta deposits against proteolysis, thereby promoting plaque formation.	2	19052452	2--8
	Our data suggest that measurement of CSF SAP levels can aid in the identification of incipient AD among MCI patients.		19052452	2--8
SLC6A4	Our results indicate that triple transgenic mice display changes in the expression of SERT and increased SERT fibres sprouting, which may account for imbalanced serotonergic neurotransmission associated with (or linked to) AD cognitive impairment.	1	20576032	2010-07-01
SLC30A6	Increased ZnT-6 immunostaining in neurons containing cytoplasmic inclusions in MCI, AD, and PD suggests a role for ZnT-6 in the pathogenesis of these lesions.	3	16772872	2006-05-01
	Overall, our results suggest that alterations in Zn transport proteins may contribute to the pathology observed in PCAD subjects before onset of clinical symptoms.		19371353	2010-03-01
	Our previous studies demonstrate alterations of zinc (Zn) transporter proteins ZnT-1, ZnT-4 and ZnT-6 in vulnerable brain regions of subjects with mild cognitive impairment (MCI), and early and late stage Alzheimer's disease (AD), suggesting disruptions of Zn homeostasis may play a role in the pathogenesis of AD.		19371353	2010-03-01
SLC30A4	Accumulating evidence suggests that a disruption of zinc (Zn) homeostasis may play a role in the pathogenesis of Alzheimer's disease.	2	16580781	2006-07-01
	Overall, our results suggest that alterations in Zn transport proteins may contribute to the pathology observed in PCAD subjects before onset of clinical symptoms.		19371353	2010-03-01
EphA4	The results suggest that alterations in Eph receptors may play a role in synaptic dysfunction in the hippocampus leading to cognitive impairment in a model of AD.	1	19542617	2--9
GAL	The functional consequences of GAL plasticity in AD are unclear. GAL inhibits cholinergic transmission in the hippocampus and impairs spatial memory in rodent models, suggesting GAL overexpression exacerbates cognitive impairment in AD.	2	18500641	2008-06-01
	GAL inhibits cholinergic transmission in the hippocampus and impairs spatial memory in rodent models, suggesting that GAL overexpression exacerbates cognitive impairment in AD.		21299067	2--10
SLC18A3	These data suggest that cholinergic neurons, and the coexpression of ChAT and VAChT, are relatively preserved in early stages of AD.	1	17580085	2007-08-01
CASP6	we suggest that active Csp6 could be an early instigator of neuronal dysfunction.	2	17392160	2007-04-01
	Since Casp6 is activated in mild cognitive impairment (MCI) and Alzheimer's disease (AD) patients' brains, the targeting of p97 by Casp6 may represent an important step that leads to UPS impairment in AD		20427671	2010-04-01
CST3	In the present multicentric electroencephalographic (EEG) study, we analyzed the effects of CST3 haplotypes on resting cortical rhythmicity in subjects with AD and mild cognitive impairment (MCI) with the hypothesis that sources of resting EEG rhythms are more impaired in carriers of the CST3 B haplotype than non-carriers	3	16213753	2006-02-01
	In the present multicentric electroencephalographic (EEG) study, we analyzed the effects of CST3 haplotypes on resting cortical rhythmicity in subjects with AD and mild cognitive impairment (MCI) with the hypothesis that sources of resting EEG rhythms are more impaired in carriers of the CST3 B haplotype than non-carriers		16213753	2006-02-01
	Cystatin C is suggested to be involved in neurodegeneration and the development of Alzheimer's disease (AD) by binding to soluble amyloid-beta (Abeta) peptides.		20555147	2--10
SORL1	The correlation between LR11 expression and cognitive performance indicates that reduced LR11 levels reflect disease severity and may predict progression to AD in a subgroup of individuals with MCI.	1	17721864	2007-12-01
ADRBK1	The increased cytosolic GRK2 appears to be colocalized with damaged mitochondria and neurofibrillary tangles.	1	20730384	2010-08-01
UTP11L	In conclusion, the expression of the nucleolar phosphoprotein CGI-94 appears to be disturbed in early processes of neuronal degeneration.	1	11860508	2002-01-01
CREB1	The CREB-regulated transcriptional network included upregulated and downregulated sets of ADGs and IADGs, suggesting an involvement of generalized deregulation of the CREB signaling pathway in the pathophysiology of AD, beginning at the early stage of the disease.	2	20037212	2--9
	Several lines of evidence indicate that cyclic AMP responsive element binding protein (CREB) and protein kinase A (PKA) are involved in soluble Abeta-trigged disruption of synaptic plasticity in early AD.		20157253	2--10
ENO1	Therefore, oxidative inactivation of ENO1, GLUL and PIN1 may alter these cellular processes and lead to the development of AD from MCI.	1	20505099	2010-05-01
HDAC4	These preclinical results indicate that targeted inhibition of class I HDAC isoforms is a promising avenue for treating the cognitive deficits associated with early stage AD.	1	20010553	2010-03-01
DNMBP	In view of the fact that synaptic dysfunction precedes Abeta deposition in the brains of AD patients, our observations raise the possibility that DNMBP, as one of risk factors, might play a predominant role in the early stage of LOAD lacking the APOE-epsilon4 allele.	1	18210832	2007-11-01
RAB6A	Increased endocytic pathway activity, driven by elevated rab GTPase expression, may result in long-term deficits in hippocampal neurotrophic signaling and represent a key pathogenic mechanism underlying AD progression.	1	20655510	2010-11-01
PIN1	Because of the diverse functions of Pin1, and the discovery that this protein is one of the oxidized proteins common to both MCI and AD brain, the question arises as to whether Pin1 is one of the driving forces for the initiation or progression of AD pathogenesis, finally leading to neurodegeneration and neuronal apoptosis.	1	16945100	2006-09-01
HFE	Although confirmation is required, these findings suggest that HFE mutations are associated with increased oxidative stress and Braak stage, and that HFE and APOE genotypes are different between AD patients, high pathology and low pathology controls.	3	12707938	2003-05-01
	We suggest that the combination of TF C2 and HFE C282Y may lead to an excess of redox-active iron and the induction of oxidative stress in neurones, which is exacerbated in carriers of APOE4.		15060098	2004-04-01
	Recent reports suggest that heterozygosity for the two common hfe mutations responsible for hereditary hemochromatosis (HH) may be a risk factor for AD, possibly by accelerating brain iron accumulation.		15013567	2004-04-01
RaB5A	Results indicate selective upregulation of both rab5 and rab7 levels within basal forebrain, frontal cortex, and hippocampus in MCI and AD, which also correlated with Braak staging.	2	20847427	2--10
	Overexpression of rab5 in cells suppressed TrkB expression, whereas knockdown of TrkB expression did not alter rab5 levels, suggesting that TrkB downregulation is a consequence of endosomal dysfunction associated with elevated rab5 levels in early AD.		20655510	2010-11-01
BLVRA	These results demonstrated a dichotomy between biliverdin reductase-A protein levels and activity in the hippocampus of subjects affected by Alzheimer disease and mild cognitive impairment, and this effect likely is attributable to a reduction in the phosphorylation of serine, threonine and tyrosine residues of biliverdin reductase-A.	1	21241799	2011-04-01
KLC1	These findings support earlier indications that genetic variability in the KNS2 gene may play a role during early stages of AD pathogenesis.	1	17611642	2007-08-01
CXCL10	Interferon-gamma-inducible protein 10 is specifically increased in MCI and seems to decrease with the progression of AD, whereas MCP-1 and IL-8 are up-regulated also in late stages of the disease, suggesting a role in phases in which neurodegeneration is prevalent.	2	16606766	2006-04-01
	Some of them, including Tumor Necrosis Factor-alpha, Interferon-gamma-inducible Protein-10, Monocyte Chemotactic Protein-1 and Interleukin-8, are increased in AD and in Mild Cognitive Impairment, considered the prodromal stage of AD, suggesting that these modifications occur very early during the development of the disease, possibly explaining the failure of trials with anti-inflammatory agents i…		21196374	2011-01-01
KRT28	This means that the desolvation of D23/K28 residues may contribute to the kinetic barrier of aggregation in the early stage.	1	17115426	2007-02-01
HN	In vivo studies suggest that HN may also protect against cognitive impairment due to ischemia/reperfusion injury.	2	21098860	9-2010 - 10-2010
	Several studies have also confirmed that HN could be important in the prevention of angiopathy-associated Alzheimer's disease dementia, diseases related to mitochondrial dysfunction		21098860	9-2010 - 10-2010
HDAC1	These preclinical results indicate that targeted inhibition of class I HDAC isoforms is a promising avenue for treating the cognitive deficits associated with early stage AD.	1	20010553	2010-03-01
GRM1	Therefore, group I mGluR dysfunction may be implicated in the pathogenesis of cognitive impairment and dementia in common form of DLB and pure AD.	1	15949941	2005-12-01
GSTM3	A functional polymorphism rs7483 in GSTM3 may contribute to the decrease in GSTM3 expression in AD.	1	18423940	2010-01-01
SOD1	Parallel experiments in ETNA cell lines expressing SOD1 suggested that the effect of beta-amyloid on calcineurin expression is mediated by oxidative stress.	2	17344052	2007-05-01
	In conclusion, our results show that Bax and Sod1 mRNA levels are altered in PBMCs from both MCI and AD patients and indicate these changes as potential biomarkers in the early diagnosis of AD.		19429011	2009-03-01
SORT1	The stability of cortical sortilin levels in the face of stable p75(NTR), increased proNGF, and reduced TrkA levels may favor pro-apoptotic proNGF:p75(NTR):sortilin trimeric interactions within the cortex during the earliest stages of AD.	1	20085800	2010-03-01
GRK5	Recent studies have indicated the possible involvement of GRK, primarily GRK2 and GRK5, dysfunction in the pathogenesis of AD.	1	20730384	2010-08-01
ACE	These results suggest that perindopril ameliorated the cognitive impairment in the Alzheimer's disease model mice through the inhibition of brain ACE activity, but not peripheral ACE activity	1	20627092	2010-09-01
CA2	These results provide further evidence that changes in CAII level may play a role in the pathogenesis of AD.	1	19686046	2010-03-01
IL18	In conclusion, amyloid-beta may induce the synthesis of IL-18, and IL-18 kinases involved in tau phosphorylation as a part of the amyloid-associated inflammatory reaction.	1	17658666	2009-02-01
BAX	In conclusion, our results show that Bax and Sod1 mRNA levels are altered in PBMCs from both MCI and AD patients and indicate these changes as potential biomarkers in the early diagnosis of AD.	1	19429011	2009-03-01
HSD17B4	The results indicate that a deficit in d-bifunctional protein activity impairs docosahexaenoic acid biosynthesis in liver of Alzheimer's disease patients, lessening the flux of this neuroprotective fatty acid to the brain.	1	20838618	2010-09-01
NFATC2	The results suggest that NFAT signaling is selectively altered in AD and may play an important role in driving Abeta-mediated neurodegeneration.	1	19828810	2009-10-01
UBE2I	Our investigation suggests that UBE2I polymorphisms might be associated with a risk of AD and MCI.	1	19765634	2009-11-01
KCNB1	This study indicates that the expression up-regulation of Kv1.4, Kv2.1, and Kv4.2 in Abeta-induced cognitive impairment might play an important role in the pathogenesis of Alzheimer's disease.	1	15197742	2004-07-01
KCND2	This study indicates that the expression up-regulation of Kv1.4, Kv2.1, and Kv4.2 in Abeta-induced cognitive impairment might play an important role in the pathogenesis of Alzheimer's disease.	1	15197742	2004-07-01
SNCA	The alpha-synuclein (alpha SN) protein is thought to play a central role in the pathogenesis of neurodegenerative diseases where it aggregates to form intracellular inclusions.	2	10860784	2000-06-01
	Consequently, abnormal transport, metabolism or function of NACP/alpha-synuclein appears to impair synaptic function, which induces, at least in part, neuronal degeneration in several neurodegenerative diseases.		10899435	2000-07-01
PRNP	It has been suggested that the cellular prion protein (PrP(C)) mediates the impairment of synaptic plasticity induced by Abeta.	2	20133875	2010-02-01
	Recently, the scientific attention has been attracted by the results proposing the possibility that PrPc, the protein whose pathologic form is responsible of TSE, can mediated the toxic effect of β amyloid (Aβ) oligomers.		21150333	1-2011 - 3-2011
ADD3	This response provides a pathologically specific mechanism for the therapeutic action of memantine, indicates a role for ROS dysregulation in ADDL-induced cognitive impairment, and supports the unifying hypothesis that ADDLs play a central role in AD pathogenesis.	2	17308309	2007-04-01
	These data suggest that cerebral oAbeta/ADDL assemblies generated in brain in situ from human APP transgenes may be associated with cognitive impairment.		20641005	2010-08-01
CYP46A1	CYP46A1 gene may act to modulate the course of cognitive deterioration in late life.	1	19212968	2009-09-01
PTGS2	The results showed that chronic treatment with flavonoids reverses cognitive deficits in aged and LPS-intoxicated mice which suggests that modulation of cyclooxygenase-2 and inducible nitric synthase by flavonoids may be important in the prevention of memory deficits, one of the symptoms related to AD.	3	12928578	2003-10-01
	This suggests that in AD brain COX-1 and COX-2 are involved in inflammatory and regenerating pathways respectively.		18537664	2--8
	This finding suggests that COX might participate in Ab toxicity in neurons in the early stage of AD independently of its role in the inflammatory reaction in glial cells in the advanced stage of AD.		20358486	1-2010 - 2-2010
SMUG1	The extent and local severity of the reduction in FDG uptake in probable AD subjects are associated with cognitive impairment. In addition, there appears to be a relationship between local FDG uptake and CSF biomarkers which differs between different brain regions.	1	19219430	2009-07-01
HTR1A	Since cholinergic loss in the hippocampus (and neocortex) occurs in association with cognitive decline in Alzheimer's disease, these results suggest that 5-HT1A antagonists may have a role in the treatment of some of the cognitive symptoms of dementia.	3	8912403	1996-10-01
	Recent studies have suggested modifications of serotonin cerebral metabolism and of 5-HT(1A) receptors density in Alzheimer disease (AD).		17785670	2007-09-01
	Animal studies and pharmacological studies in man have suggested that the serotonin 5-HT(1A) receptor may serve as a biomarker for cognitive functioning and a target for treatment of cognitive impairment.		18606193	2008-12-01
NEFL	The aim of the study was to assess whether baseline CSF hyperphosphorylated tau (P-tau), total tau (T-tau), amyloid beta 1-42 (Abeta(42)) and neurofilament light (NF-L) in patients with MCI could predict subcortical vascular dementia (SVD) and Alzheimer's disease (AD) at follow-up.	1	19864909	2--9
SERPINF1	Our present observations suggest that PEDF in CSF might reflect cerebral PEDF turnover and provide a means for monitoring neuronal perturbation induced by oxidative stress in the early stage of AD.	1	15193361	2--4
CLU	These results demonstrate an important role of clusterin in the pathogenesis of AD and suggest that alterations in amyloid chaperone proteins may be a biologically relevant peripheral signature of AD.	1	20603455	2010-07-01
IL6	However, significant elevation in IL-6 secretion levels was observed in both the mild and moderately severe AD patients. Our results suggest that peripheral IL-6 secretion levels may be responsible for acute-phase proteins observed in the serum of AD patients.	1	7970167	1994-06-01
SST	These and other results suggest that substance P deficits are related to movement disorders while somatostatin deficits are related to cognitive impairment.	2	6084823	1984-12-01
	These data indicate that somatostatin decreases in AD and its expression may be linked with Abeta deposition.		19559700	2010-06-01
S100B	These results suggest increased CNS expression of S100B in the earlier stages of AD, and are consistent with a role for S100B in the initiation and/or facilitation of neuritic plaque formation in AD brain.	4	11578776	11-2001-12-2001
	Variations in the S100beta gene may be instrumental in producing a continuum from mild cognitive decline to overt dementia.		17579612	2007-09-01
	The hypothesis that the overexpression of S100B in Alzheimer brain is related to the progression of clinical symptoms was addressed in living persons by measuring S100B concentrations in cerebrospinal fluid (CSF) from AD patients with a broad range of clinical dementia severity and from healthy older persons.		17579612	2007-09-01
	The loss of serotonin S2 receptors may occur at an early stage of the disease and, in temporal and frontal cortex, is correlated with the loss of somatostatin immunoreactivity.		21264269	2011-01-01
DKK3	In summary, our data indicate that elevated Dkk-3 levels are specifically associated with AD and might serve as a potential non-invasive AD biomarker in plasma.	1	11578776	11-2001-12-2001
ALOX15	These results suggest that the activation of this enzyme occurs early in the course of AD, before the onset of overt dementia, thereby implicating 12/15LOX-mediated lipid peroxidation in the pathogenesis of AD.	2	16037976	2005-10-01
	12/15 Lipoxygenase metabolic products are elevated in cerebrospinal fluid of patients with AD and individuals with mild cognitive impairment, suggesting that this enzyme may be involved early in AD pathogenesis.		17877641
TNFRSF1A	TNFR-signaling might be involved in the early pathogenesis of AD and VaD, and could be associated with beta-amyloid metabolism.	1	19070941	2010-11-01
HTR2A	Our finding suggests that profoundly reduced cortical 5-HT2A receptor binding is an early feature in MCI whereas the clinical progression from MCI to AD is less associated with further decrease in binding.	1	21098981	2011-01-01
A2M	The association of plasma CFH and A2M with hippocampal NAA/mI in this cohort of AD subjects suggests that these proteins may reflect disease progression in early AD.	1	19156487	2008-11-01
LRP8	Thus, the impairment of apoE receptor-dependent neuromodulation may contribute to cognitive impairment and synaptic loss in Alzheimer disease.	2	12167620	2002-10-01
	This review examines potential altered function(s) of brain enolase in MCI, early-onset AD, and AD, alterations that may contribute to the biochemical, pathological, clinical characteristics, and progression of this dementing disorder.		19780894	2009-11-01
PLA2G6	Evidence suggests that reduced activity of specific subtypes of intracellular phospholipases A2 (cPLA2 and iPLA2) is an early event in AD and may contribute to memory impairment and neuropathology in the disease.	2	18853146	2009-01-01
	The use of positive modulators of PLA2 (especially of cPLA2 and iPLA2) or supplementation with dietary lipid compounds (e.g., arachidonic acid) in combination with cognitive training could be a valuable therapeutic strategy for cognitive enhancement in early-stage AD.		18853146	2009-01-01
HTR1F	Notably, human studies suggest a potential utility of 5-HT6 receptor antagonists in mild-to-moderate AD patients.	1	21329783	2--11
TCP1	Comparable response of chaperone proteins in fetal DS brain suggests that not heat-shock induced proteins but rather chaperonin protein TCP-1 may contribute significantly to neuropathogenesis in the early second trimester DS brain.	1	11771755	2--1
PPP1R3A	These data suggest that long-term consumption of ginsenoside Rg1 may delay cognitive decline, associated with significant effects on Abeta generation, PKA/CREB activity, as well as BDNF content in the brain.	1	20157253	2--10
CCL2	Some of them, including Tumor Necrosis Factor-alpha, Interferon-gamma-inducible Protein-10, Monocyte Chemotactic Protein-1 and Interleukin-8, are increased in AD and in Mild Cognitive Impairment, considered the prodromal stage of AD, suggesting that these modifications occur very early during the development of the disease, possibly explaining the failure of trials with anti-inflammatory agents i…	1	21196374	2011-01-01
ZC3H12A	Nevertheless, as MCP-1 is likely to play a role in several pathologies with an inflammatory component, a possible usefulness as an early AD biomarker would be possible only in combination with other molecules.	2	16307829	2006-12-01
	Moreover, a progressive MCP-1 decrease was observed over a 1-year follow up in a subgroup of MCI subjects converted to AD. MCP-1 upregulation is likely to be a very early event in AD pathogenesis, by far preceding the clinical onset of the disease.	1	16307829	2006-12-01
YY1	The identification of the cell type-specific expression and activation of NF-kappaB, Sp1 and YY1 transcription factors may provide a basis to specifically interfere with BACE1 expression and, thereby, to lower the concentrations of beta-amyloid peptides, which may prevent neuronal cell loss and cognitive decline in AD patients.	1	16904810	2006-06-01
ADORA2A	These data, which need to be confirmed in a larger number of patients, suggest that expression of A2AR in PBMCs may be a valuable means of differentiating a-MCI and mcd-MCI.	1	20413899	2--10
KCNA4	This study indicates that the expression up-regulation of Kv1.4, Kv2.1, and Kv4.2 in Abeta-induced cognitive impairment might play an important role in the pathogenesis of Alzheimer's disease.	1	15197742	2004-07-01
SCARB1	We hypothesized that SR-BI-dependent lipid dysregulation might disrupt brain function leading to cognitive impairment.	1	17719144	2009-03-01
NOS2	Increased expression of iNOS during REM sleep of patients with AD might be a compensation mechanism for maintaining REM sleep.	1	20541418	2010-09-01
TTR	After further study of larger numbers of patients, quantifying prostaglandin-d-synthase/transthyretin complex in CSF may be useful in the diagnosis of Alzheimer disease, possibly in the early stages of the disease.	1	18448869	2008-06-01
MTHFR	Our findings suggest that TT677 MTHFR genotype promotes plasma homocysteine increase which in turn may favour intima-media thickening in patients with cognitive impairment.	1	19342053	2009-09-01
TUBA1B	Reported reductions in a microtubule stability marker, acetylated alpha-tubulin, suggest that disrupted transport occurs in Alzheimer's disease neurons, and such a reduction is known to be associated with transport failure and synaptic compromise in a hippocampal slice model of protein accumulation.	1	17336290	2007-05-01
GLUL	Therefore, oxidative inactivation of ENO1, GLUL and PIN1 may alter these cellular processes and lead to the development of AD from MCI.	1	16466929	2006-05-01
PPARG	These findings suggest that ARB has a preventive effect on cognitive impairment in Alzheimer disease, and telmisartan, with PPAR-gamma activation, could exert a stronger effect.	1	18715543	2008-10-01
CD36	Irrespective of the mechanism(s) underlying such changes, assessment of leukocyte CD36 expression might represent an useful tool to support the diagnosis of AD and to screen MCI patients candidates to develop the disease.	1	16563568	2007-04-01
MIF	These results demonstrate increased MIF production in AD and MCI suggesting that MIF may be involved in the occurring neuroinflammatory process at a clinical pre-dementia disease stage.	1	19038405	2009-05-01
CTSB	Cathepsin B is suggested to be involved in amyloid-β (Aβ) processing and Alzheimer's disease (AD).	1	20930303	2--10
MAPK1	Thus, this peripheral molecular biomarker, based on differential Erk1 and Erk2 phosphorylation, could have important clinical utility for providing increased certainty in the positive diagnosis of AD, particularly in the early phase of disease progression.	1	16920798	2006-08-01
NCAM1	Our results suggest that NCAM could be involved in the pathogenesis of DAT disorder and that serum NCAM levels could be useful as differential diagnostic markers of the disease.	1	15006709	2004-03-01
TXN	The results show a general induction of HSPs and decreased levels of Thioredoxin 1 in aMCI brain suggesting that alteration in the chaperone protein systems might contribute to the pathogenesis and progression of AD.	1	20362559	2010-05-01
HP	These findings suggest that the CSF levels of both RBP and haptoglobin precursor allele 1 may be candidate biomarkers for the progression of normal to MCI to AD.	1	18378077	2008-05-01
