# Supplementary material for: ‘HypothesisFinder:’ A Strategy for the Detection of Speculative Statements in Scientific Text
Source: PLoS Comput Biol. 2013 Jul 25;9(7):e1003117. doi: 10.1371/journal.pcbi.1003117 (PMC3723489; doi:10.1371/journal.pcbi.1003117)
Supplement: Dataset S4 — Hypothesis related to Severe stage of AD extracted by using HypothesisFinder in combination with Alzheimer's disease ontology (ADO) and Human gene and protein dictionary within SCAIView. (XLS) [file pcbi.1003117.s004.xls]

## Sheet: Sheet1
	Severe stage hypothesis
	Explicit Evidence:Disease stage is exclusively mentioned in the sentence
	Implicit Evidence"Disease stage if inferred by reading the abstract
Name	Hypotheses	Number of hypotheses per gene	PubMed ID	Date of publication
APP	This review article describes recent findings that may lead to the development of a strategy for AD prevention by decreasing the cellular cholesterol level, and also focuses on the impact of Abeta on cholesterol metabolism in AD and mild cognitive impairment (MCI), which may result in promotion of the amyloid cascade at later stages of the AD process.	12	12668899	2003-02-01
	Serum amyloid P component (SAP), present in amyloid-beta (Abeta) plaques in Alzheimer's disease (AD), may protect Abeta deposits against proteolysis, thereby promoting plaque formation		19052452	2008-02-01
	Amyloid beta-peptide 1-42 (Abeta(1-42)) and hyperphosphorylated tubulin associated unit (tau) isoforms appear to be the most sensitive and specific CSF biomarkers, the combination of these biomarkers depicting the best diagnosis value for AD.		18584921	2008-10-01
	Moreover, Abeta may play a role in prediction the conversion of MCI to AD.		19519314	2009-06-01
	The markers of oxidative stress have been localized in the brain regions of AD and MCI that show pathological hallmarks of this disease, suggesting the possible role of Abeta in the initiation of the free-radical mediated process and consequently to the build up oxidative stress and AD pathogenesis.		19777328	2009-10-01
	We conclude sAPP alpha and sAPP beta might be regarded as novel promising biomarkers supporting the clinical diagnosis of AD.		18663368	2010-02-01
	beta-amyloid peptide (Abeta) is thought to play a critical role in the pathophysiology of Alzheimer's disease (AD).		20056779	2010-04-01
	Therefore, amyloid-beta may be useful as a biomarker of AD, not only for the very early diagnosis but also for monitoring the therapeutic effect of disease-modifying agents that may reduce the amount of deposited amyloid-beta in the brains of patients with AD		20675880	2010-07-01
	We conclude that the CSF HMW Abeta oligomers detected by our ELISA could be useful as a diagnostic marker for AD, and also as a potential surrogate marker for disease severity		20339023	2010-08-01
	The oxidative stress observed in brains of subjects with AD and MCI may be due, either fully or in part, to increased free radicals mediated by amyloid-beta peptide (Abeta		20648652	2010-09-01
	These data indicate an overlap in TDP-43 pathology between AD and ALS-FTLD and suggest that Aβ triggers modifications of TDP-43.		21376022	2011-04-01
	In conclusion, a reduction in cortical brain sAPPβ together with unchanged BACE1 activity suggests that this is due to reduced full-length APP substrate in late-stage AD subjects.		21433051	2011-06-01
	We hypothesize that the internalization of extracellular Aβ aggregates is the major cause of mitochondrial damage and here we report that following the injection of fibrillar Aβ into the hippocampus, there is severe axonal damage which is accompanied by the entrance of Aβ into the cell.		22666521	2012
MAPT	It is concluded that CSF measures of both apoE and tau may reflect an intimate relationship between these two proteins in AD and could prove useful in monitoring the progression of this condition	17	9223597	1997-06-01
	These results are consistent with other reports showing that cytoskeletal changes and tau pathology in the olfactory epithelium are not primary (or specific) features of AD and may occur predominantly in late stages of the disease.		9693230	1998-07-01
	Finally, biochemical studies have demonstrated that certain proteins (e.g., tau the A beta 1-42/43 metabolite of the amyloid precursor protein) may be associated with the disease process in AD, although the specificity of these markers remains to be established		10654093	1999-04-01
	Studies have found high levels of tau phosphorylated at Threonine 231 and/or Serine 199 in AD but not in other causes of dementia, in depression or in healthy elderly controls. Of particular interest, the test appears equally valid in cases of early AD as in moderate or late stages and may also be of use in predicting future decline in subjects with mild cognitive impairment.		12766916	2003-05-01
	Our findings support the notion that CSF tau and Abeta(1-42) may be useful biomarkers in the early identification of AD in MCI subjects.		14699432	2004-07-01
	nterestingly, findings from our laboratory using tau immunohistochemistry and single cell gene array technologies suggest that GAL remodeling may influence neurofibrillary tangle formation by altering tau phosphorylation events in CBF neurons in AD		15893372	2005-06-01
	Our results show that modification of tubulin function may contribute to intermediate or late stages in the pathogenesis of sporadic and inherited AD as well as FTDP-17.		16155344	2005-09-01
	Our results show that modification of tubulin function may contribute to intermediate or late stages in the pathogenesis of sporadic and inherited AD as well as FTDP-17.		16155344	2005-09-01
	Since the presence of pathological levels in >or=2 cerebrospinal fluid (CSF) biomarkers; amyloid protein (Abeta42), total tau (h-tau) and phospho-tau (p-tau) seems to reliably identifying MCI subjects converting to AD, we report our experience in a routine clinical setting		16274728	2006-02-01
	Our data suggest that 1) insoluble Abeta _{42} and insoluble tau (total or PHF_{tau}) show a significant relationship with the clinical and neuropathological diagnosis of AD		18198424	2007-12-01
	Whereas it is reasonable to assume that tau aggregation is toxic during late stages of disease, the question arises whether early in disease it may be protective.		18688093	2008-08-01
	Amyloid beta-peptide 1-42 (Abeta(1-42)) and hyperphosphorylated tubulin associated unit (tau) isoforms appear to be the most sensitive and specific CSF biomarkers, the combination of these biomarkers depicting the best diagnosis value for AD.		18584921	2008-10-01
	our data indicate that from a clinical point of view significantly increased tau protein levels confirm the clinical diagnosis of AD while normal values do not exclude it.		18327693	2008-12-01
	Both, an increase in p tau levels and a decrease in cerebrospinal fluid APPs alpha, seem to refer to relevant but functionally different processes in the development of mild cognitive impairment and dementia of Alzheimer's type		19073834	2009-03-01
	Six hippocampal tau anatomical stages were defined, each linking projectionally to their adjacent stages, suggesting spread of tau malfunction through neuroanatomical pathways in hippocampal ageing.		19321462	2009-05-01
	High tau protein in combination with low amyloid beta levels has a high sensitivity (80%) and specificity (90%) for Alzheimer's disease (AD) against normal aging and can predict conversion of mild cognitive impairment to AD		19475759	2009-06-01
	Tau and Abeta42 in CSF seem to reflect the underlying disease state in both early and late stages of AD.		19609443	2009-07-01
PRX	In the present study, compared to controls, we observed in hippocampus from subjects with MCI a significantly decreased level of PSD95, a key synaptic protein, and also decreased levels of two proteins associated with PSD95, the N-methyl-D-aspartate receptor, subunit 2A (NR2A) and the low-density lipoprotein receptor-1 (LRP1). PSD95 and NR2A are involved in long-term potentiation, a key component…	1	19774677	2010-02-01
GRIN2A	In the present study, compared to controls, we observed in hippocampus from subjects with MCI a significantly decreased level of PSD95, a key synaptic protein, and also decreased levels of two proteins associated with PSD95, the N-methyl-D-aspartate receptor, subunit 2A (NR2A) and the low-density lipoprotein receptor-1 (LRP1). PSD95 and NR2A are involved in long-term potentiation, a key component…	1	19774677	2010-02-01
APOE	These findings suggest that there may be apolipoprotein E (apoE) isoform-specific differences of tau regulation in AD.	5	8878109	1996-08-01
	It is concluded that CSF measures of both apoE and tau may reflect an intimate relationship between these two proteins in AD and could prove useful in monitoring the progression of this condition.		9223597	1997-06-01
	ApoE transcription was increased approximately 3-fold in the hippocampus of 17-month-old APPV717F mice, suggesting a region-specific upregulation of apoE transcription in the brains of APPV717F mice to compensate for apoE sequestered with fibrillar A beta.		11338204	2001-05-01
	The present study partially confirmed the previous findings, suggesting that the ApoCI A allele might contribute to the susceptibility to moderate to severe sporadic AD in Chinese.		14705977	2004-02-01
	The levels of apoE in cerebrospinal fluid were also correlated to the levels of Tau and the possibility is discussed that the level of apoE in cerebrospinal fluid may be used as a marker of neurodegeneration.		17822846	2007-09-01
CHAT	The subnormal ChAT mRNA content may be the consequence of changes in the level of transcription of the ChAT gene, possibly in relation to sustained suffering still present at the late stages of this disease.	4	9147397	1997-04-01
	Synaptophysin and ChAT appear to be more vulnerable in severe AD than are syntaxin or SNAP-25.		11589423	2001-10-01
	It has been hypothesized that choline acetyltransferase (ChAT) activity might be associated with cognitive impairment in Alzheimer's disease (AD)		18562794	2--8
	A functional single nucleotide polymorphism (2384 G/A) of ChAT was proposed to be associated with AD risk and age of onset		18562794	2--8
ACHE	In attempts to define the proteases or factors which alter the balance between nonamyloidogenic and amyloidogenic processing pathways, our study indicates that thrombin or acetylcholinesterase(AChE)-associated protease may be involved in the amyloidogenic processing pathway of APP in vivo to generate amyloidogenic intermediates linked to amyloid deposition.	4	8687017	1996-06-01
	These findings suggest that high AChE activity is intimately associated with the process of A4 protein formation and accumulation in plaques and that this association already occurs at a very early stage of plaque formation.		1703383	19-90
	In severe AD, levels of AChE and choline acetyltransferase are decreased by as much as 90% compared with normal, whilst butyrylcholinesterase (BuChE) increases.		12973744	2003-09-01
	This finding may be of therapeutic relevance because BChE activity is preserved, but AChE activity is strongly decreased, in late-stage Alzheimer s disease.		19470293	2--9
BACE1	BACE1 levels are increased in postmortem AD brain, suggesting BACE1 elevation promotes Abeta production and AD. Alternatively, the BACE1 increase may be an epiphenomenon of late-stage AD.	7	17409228	2007-04-01
	We conclude that BACE1 elevation is most likely triggered by the amyloid pathway and may drive a positive-feedback loop in AD.		17409228	2007-04-01
	The assessment of BACE 1 in CSF may provide a sensitive measure to detect in vivo alterations in the amyloidogenic processing potentially modified by the ApoE genotype.		18334538	2008-05-01
	beta-site APP cleaving enzyme (BACE1) is thought to be the major beta-secretase involved in Abeta production in the brain		20164582	2--10
	These data suggest that increased BACE1 activity in CSF relates to AD pathology in the brain.		20164582	2--10
	In addition, we found, for the first time, a reduction of beta-secretase (BACE1) enzyme activity, mRNA level and protein expression in the male APP23/Ar(+/-) mice, suggesting that endogenous testosterone, independent from estrogen, may protect against AD in males via two major mechanisms, downregulation of BACE1 activities at transcriptional level to reduce beta amyloid production and upregulatio…		20505099	2010-05-01
	Several reports demonstrate increased BACE1 enzymatic activity in brain and cerebrospinal fluid (CSF) from Alzheimer's disease (AD) subjects, suggesting that an increase in BACE1-mediated cleavage of APP drives amyloid pathophysiology in AD.		21433051	2011-06-01
NGF	NGF could be expected to induce basal forebrain cholinergic cells to hypertrophy, synthesize more choline acetyltransferase and extend neurites.	5	2538704	1989-01-01
	Decreased NGF production does not seem to play a causal role both in age-related cognitive impairment and AD which is usually associated with neurodegenerative processes in the cholinergic basal forebrain system.		7997075	19-94
	Recent findings indicate an early defect in NGF receptor expression in CBF neurons; therefore treatments aimed at facilitating NGF actions may prove highly beneficial in counteracting the cholinergic dysfunction found in end-stage AD and attenuating the rate of degeneration of these cholinergic neurons.		14529363	2003-10-01
	Given that proNGF is known to be upregulated in AD patients a dysregulation in the maturation or degradation of mature NGF might explain the preferential vulnerability of the cholinergic system in the AD pathology.		17908036	2007-09-01
	These findings suggest that a reduction in mNGF as a consequence of MMP-9-mediated degradation may in part underlie the pathogenesis of cognitive deficits in mild cognitive impairment and AD		19915485	2009-12-01
AOC3	Our results suggest that an increase in circulating SSAO activity could contribute to oxidative stress and vascular damage in advanced Alzheimer's disease.	1	15894424	2005-08-01
BDNF	Our findings indicate that BDNF serum levels increase in MCI and AD	1	20205668	2010-02-01
BCHE	In severe AD, levels of AChE and choline acetyltransferase are decreased by as much as 90% compared with normal, whilst butyrylcholinesterase (BuChE) increases.	4	12973744	2003-09-01
	In severe AD, levels of AChE and choline acetyltransferase are decreased by as much as 90% compared with normal, whilst butyrylcholinesterase (BuChE) increases. In such instances, it is possible that BuChE may be a more appropriate therapeutic target		12973744	2003-09-01
	Recent evidence from studies examining butyrylcholinesterase in post mortem brain samples from dementia patients and examining the relationship between butyrylcholinesterase polymorphisms and the progression of cognitive impairment in dementia with Lewy bodies and Alzheimer's disease add to a body of work suggesting that butyrylcholinesterase is present in key brain areas and may influence the ma…		15853480	2005-01-01
	These accumulating data suggest that butyrylcholinesterase contributes to disease progression in people with dementia, which may be particularly important in individuals with more severe dementia as butyrylcholinesterase activity increases with disease development.		15853480	2005-01-01
NGFR	Recent findings indicate an early defect in NGF receptor expression in CBF neurons; therefore treatments aimed at facilitating NGF actions may prove highly beneficial in counteracting the cholinergic dysfunction found in end-stage AD and attenuating the rate of degeneration of these cholinergic neurons	1	14529363	2003-10-01
SERPINA3	These data indicate that serum and CSF levels of alpha 1-antichymotrypsin might be independently upregulated in Alzheimer-type dementia.	2	2147546	1990-10-01
	These results suggest that alpha 1-antichymotrypsin is associated with the early to late stages of amyloid deposition and senile plaque formation in senile demential of the Alzheimer type.		1702930	1991-01-01
NTRK1	The selective reduction of cortical TrkA levels relative to p75(NTR) may have important consequences for cholinergic NB function during the transition from MCI to AD.	3	15455399	2004-10-01
	Dysfunction of nerve growth factor (NGF) and its high (TrkA) and low (p75NTR) affinity receptors has been suggested to underlie the selective degeneration of the nucleus basalis (NB) cholinergic cortical projection neurons in end stage Alzheimer disease (AD)		15835262	2005-04-01
	Thus, trk defects may be a molecular marker for the transition from no cognitive impairment (NCI) to MCI, and from MCI to frank AD.		16539663	2006-04-01
CDK5	Using novel Cdk5 modulators, we show the mechanism by which Cdk5 can induce oxidative stress in the disease's early stage and cell death in the late stage.	1	18691386	2008-10-01
MAOB	Our data suggest that platelet MAO-B activity, but not platelet 5-HT concentration, could differentiate between psychotic and non-psychotic subtypes of AD.	2	18405069	2008-01-01
	Lower platelet 5-HT concentration and MAO-B activity in the late phase of AD suggested that these markers might indicate severity and/or clinical progress of AD.		19602426	2009-10-01
GAL	This suggests that GAL activity impacts cholinergic dysfunction in advanced AD.	6	11830760	2--1
	Interestingly, findings from our laboratory using tau immunohistochemistry and single cell gene array technologies suggest that GAL remodeling may influence neurofibrillary tangle formation by altering tau phosphorylation events in CBF neurons in AD.		15893372	2005-06-01
	These observations indicate that GAL hypertrophy within the anterior NB subfield is a late-stage AD response, which may play a role in regulating the cholinergic tone of remaining basocortical projection neurons.		16410678	2--6
	These observations indicate that GAL hypertrophy within the anterior NB subfield is a late-stage AD response, which may play a role in regulating the cholinergic tone of remaining basocortical projection neurons.		16410678	2--6
	GAL fiber hyperinnervation of cholinergic NB neurons upregulates the expression of ChAT, the synthetic enzyme for ACh, suggesting that GAL regulates the cholinergic tone of CBF neurons in AD.		18322398	2--8
	Hence, GAL fiber hyperinnervation appears to preserve the expression of genes subserving multiple neuroprotective pathways suggesting that GAL overexpression regulates CBF neuron survival in AD.		19749437	2--9
Gsk3B	In conclusion, we corroborate previous evidence of increased GSK activity in peripheral tissues of patients with MCI and AD, and further propose that platelet GSK may be an alternative peripheral biomarker of this abnormality, provided samples are adequately handled in order to preclude platelet activation.	1	20576277	2011-02-01
SLC30A1	Overall, these data suggest a significant decrease of serum Zn in men with MCI, may explain the loss of ZnT-1 observed in previous studies and suggest there may be more pronounced sex differences in MCI than were previously recognized	1	18997297	2008-11-01
APCS	Our results suggest that measurement of the SAP levels in CSF can be useful for assessing the degree of cognitive impairment in AD patients.	2	10505635	1999-10-01
	Serum amyloid P component (SAP), present in amyloid-beta (Abeta) plaques in Alzheimer's disease (AD), may protect Abeta deposits against proteolysis, thereby promoting plaque formation.		19052452	2--8
SLC6A4	These findings suggest that SLC6A4 gene variation may have only a minor role, if any, in AD or QD.	1	18490109	2008-06-01
PPID	These data demonstrate that abrogation of CypD results in persistent life-long protection against Aβ toxicity in an Alzheimer's disease mouse model, thereby suggesting that blockade of CypD may be of benefit for Alzheimer disease treatment.	1	19362755	2011-03-01
SLC30A6	Increased ZnT-6 immunostaining in neurons containing cytoplasmic inclusions in MCI, AD, and PD suggests a role for ZnT-6 in the pathogenesis of these lesions.	2	16772872	2006-05-01
	Our previous studies demonstrate alterations of zinc (Zn) transporter proteins ZnT-1, ZnT-4 and ZnT-6 in vulnerable brain regions of subjects with mild cognitive impairment (MCI), and early and late stage Alzheimer's disease (AD), suggesting disruptions of Zn homeostasis may play a role in the pathogenesis of AD.		19371353	2010-03-01
ENO2	The findings suggest that serum levels of S100B may be a marker for brain functional condition and serum NSE levels may be a marker for morphological status in AD.	1	20105309	2010-01-01
MME	Neprilysin (NEP) is a zinc metallopeptidase that efficiently degrades the amyloid beta (Abeta) peptides believed to be involved in the etiology of Alzheimer disease (AD)	4	19471248	2009-08-01
	Although evidence suggests that NEP is down-regulated in Alzheimer's disease (AD)		20663017	2010-10-01
	Correlation analyses suggested that NEP expression was correlated with Aβ accumulation and clinical diagnosis, being lower in AD than in no cognitive impairment.		20663017	2010-10-01
	These findings provide additional support for NEP as the major protease involved in Aβ degradation and suggest its possible therapeutic targeting in AD.		20663017	2010-10-01
RAB6A	Increased endocytic pathway activity, driven by elevated rab GTPase expression, may result in long-term deficits in hippocampal neurotrophic signaling and represent a key pathogenic mechanism underlying AD progression.	1	20655510	2010-11-01
CASP6	This all inclusive hypothesis called the attrition hypothesis states that activation of the effector caspase-6 in AD due to one or a variety of insults is responsible for the breakdown of the cytoskeletal structure of neurites and damages proper trafficking of proteins and organelles thus resulting in the observed clinical and pathological features of AD.	2	16248844	2005-10-01
	Since Casp6 is activated in mild cognitive impairment (MCI) and Alzheimer's disease (AD) patients' brains, the targeting of p97 by Casp6 may represent an important step that leads to UPS impairment in AD		20427671	2010-04-01
ADRBK1	Our preliminary data suggest that GRK2 is involved in GPCRs coupling dysfunction observed in AD patients.	1	17276003	2007-03-01
CREB1	These observations suggest that aberrant CREB-mediated gene regulation serves as a molecular biomarker of AD-related pathological processes, and support the hypothesis that sequestration of pCREB in GVD granules is in part responsible for deregulation of CREB-mediated gene expression in AD hippocampus.	1	20037212	2--9
PIN1	Because of the diverse functions of Pin1, and the discovery that this protein is one of the oxidized proteins common to both MCI and AD brain, the question arises as to whether Pin1 is one of the driving forces for the initiation or progression of AD pathogenesis, finally leading to neurodegeneration and neuronal apoptosis.	1	16945100	2006-09-01
PRNP	It has been suggested that the cellular prion protein (PrP(C)) mediates the impairment of synaptic plasticity induced by Abeta.	1	20942790	2010-12-01
HFE	Although confirmation is required, these findings suggest that HFE mutations are associated with increased oxidative stress and Braak stage, and that HFE and APOE genotypes are different between AD patients, high pathology and low pathology controls.	2	12707938	2003-05-01
	We suggest that the combination of TF C2 and HFE C282Y may lead to an excess of redox-active iron and the induction of oxidative stress in neurones, which is exacerbated in carriers of APOE4.		15060098	2004-04-01
RAB5A	Results indicate selective upregulation of both rab5 and rab7 levels within basal forebrain, frontal cortex, and hippocampus in MCI and AD, which also correlated with Braak staging.	1	20847427	2--10
BLVRA	These results demonstrated a dichotomy between biliverdin reductase-A protein levels and activity in the hippocampus of subjects affected by Alzheimer disease and mild cognitive impairment, and this effect likely is attributable to a reduction in the phosphorylation of serine, threonine and tyrosine residues of biliverdin reductase-A.	1	21241799	2011-04-01
CXCL10	Interferon-gamma-inducible protein 10 is specifically increased in MCI and seems to decrease with the progression of AD, whereas MCP-1 and IL-8 are up-regulated also in late stages of the disease, suggesting a role in phases in which neurodegeneration is prevalent.	2	16606766	2006-04-01
	Some of them, including Tumor Necrosis Factor-alpha, Interferon-gamma-inducible Protein-10, Monocyte Chemotactic Protein-1 and Interleukin-8, are increased in AD and in Mild Cognitive Impairment, considered the prodromal stage of AD, suggesting that these modifications occur very early during the development of the disease, possibly explaining the failure of trials with anti-inflammatory agents i…		21196374	2011-01-01
NFATC4	The results suggest that NFAT signaling is selectively altered in AD and may play an important role in driving Abeta-mediated neurodegeneration.	1	19828810	2009-10-01
PTGS1	This suggests that in AD brain COX-1 and COX-2 are involved in inflammatory and regenerating pathways respectively.	1	18537664	2--8
DKK3	In summary, our data indicate that elevated Dkk-3 levels are specifically associated with AD and might serve as a potential non-invasive AD biomarker in plasma.	1	19457090	2009-07-01
HTR1A	This suggests that 5-HT(1A) receptor alteration is directly related to aggression in AD, while dementia severity is more strongly related to the neurodegenerative process.	1	12742626	2003-06-01
GRM1	Therefore, group I mGluR dysfunction may be implicated in the pathogenesis of cognitive impairment and dementia in common form of DLB and pure AD.	1	15949941	2005-12-01
SOD1	In conclusion, our results show that Bax and Sod1 mRNA levels are altered in PBMCs from both MCI and AD patients and indicate these changes as potential biomarkers in the early diagnosis of AD.	1	19429011	2009-03-01
CA2	These results provide further evidence that changes in CAII level may play a role in the pathogenesis of AD.	1	19686046	2010-03-01
EIF2S1	Increased phosphorylated state of eukaryotic translation initiation factor-2 alpha is observed in Alzheimer's disease patients' brains and may result in impairment of cognitive functions in Alzheimer's disease patients by decreasing the efficacy of de novo protein synthesis required for synaptic plasticity.	1	17406652	2007-11-01
BAX	In conclusion, our results show that Bax and Sod1 mRNA levels are altered in PBMCs from both MCI and AD patients and indicate these changes as potential biomarkers in the early diagnosis of AD.	1	19429011	2009-03-01
SLC17A7	Our results suggest that VGLUT1 expression in the prefrontal cortex could be used as a valuable neurochemical marker of dementia in AD.	1	17531353	2008-11-01
PTGS2	This finding suggests that COX might participate in Ab toxicity in neurons in the early stage of AD independently of its role in the inflammatory reaction in glial cells in the advanced stage of AD.	1	20358486	1-2010-2-2010
NEFL	The increase in CSF NFL found in LAD might reflect the white-matter degeneration found in a proportion of LAD cases.	1	10822437	2000-05-01
SERPINF1	These results suggest that PEDF overexpression may indicate a compensation mechanism to fight against neuronal cell injury in AD	2	15193361	2--4
	From our data it appeared that two proteins, serpin F1 (pigment epithelium-derived factor) and complement C1 inhibitor are down-regulated in plasma from AD patients		21136851	2008-04-01
HMOX1	Suppression of glial HO-1 activity by pharmacological or other means may confer neuroprotection in AD by curtailing iron-mediated neurotoxicity	1	20563825	2011-03-01
EIF2S1	Increased phosphorylated state of eukaryotic translation initiation factor-2 alpha is observed in Alzheimer's disease patients' brains and may result in impairment of cognitive functions in Alzheimer's disease patients by decreasing the efficacy of de novo protein synthesis required for synaptic plasticity.	1	17406652	2007-11-01
LCN2	Therefore, we hypothesize that there may be a significant change in the plasma LCN2 levels in patients with MCI and AD when compared to healthy control subjects.	1	21463871	2011-06-01
S100B	The findings suggest that serum levels of S100B may be a marker for brain functional condition and serum NSE levels may be a marker for morphological status in AD.	1	20105309	2010-01-01
ALOX15	12/15 Lipoxygenase metabolic products are elevated in cerebrospinal fluid of patients with AD and individuals with mild cognitive impairment, suggesting that this enzyme may be involved early in AD pathogenesis.	1	17877641	2007-10-01
IL18BP	Overall, these data indicate that IL-18-related inflammatory pathways, probably also in virtue of polymorphic IL-18 gene influence, are exacerbated in AD patients, and that this cytokine may indeed participate in pathogenic processes leading to dementia.	1	17988833	2008-05-01
ENO1	Therefore, oxidative inactivation of ENO1, GLUL and PIN1 may alter these cellular processes and lead to the development of AD from MCI	2	16466929	2006-05-01
	This review examines potential altered function(s) of brain enolase in MCI, early-onset AD, and AD, alterations that may contribute to the biochemical, pathological, clinical characteristics, and progression of this dementing disorder.		19780894	2009-11-01
ZC3H12A	Interferon-gamma-inducible protein 10 is specifically increased in MCI and seems to decrease with the progression of AD, whereas MCP-1 and IL-8 are up-regulated also in late stages of the disease, suggesting a role in phases in which neurodegeneration is prevalent.	1	16606766	2006-04-01
C4A	These results suggest that C4A treatment may reduce the risk of developing Alzheimer's dementia in elderly women.	1	12663701	2003-04-01
CD36	Irrespective of the mechanism(s) underlying such changes, assessment of leukocyte CD36 expression might represent an useful tool to support the diagnosis of AD and to screen MCI patients candidates to develop the disease.	1	16563568	2007-04-01
MIF	These results demonstrate increased MIF production in AD and MCI suggesting that MIF may be involved in the occurring neuroinflammatory process at a clinical pre-dementia disease stage.	1	19038405	2009-05-01
CTSB	Cathepsin B is suggested to be involved in amyloid-β (Aβ) processing and Alzheimer's disease (AD).	1	20930303	2--10
HP	These findings suggest that the CSF levels of both RBP and haptoglobin precursor allele 1 may be candidate biomarkers for the progression of normal to MCI to AD.	1	18378077	2008-05-01
IL8	. Interferon-gamma-inducible protein 10 is specifically increased in MCI and seems to decrease with the progression of AD, whereas MCP-1 and IL-8 are up-regulated also in late stages of the disease, suggesting a role in phases in which neurodegeneration is prevalent.	1	16606766	2006-04-01
CCK	Further analyses of the data in relation to the severity of plaque formation suggest that alterations in other neurochemical activities including reductions in dopamine-beta-hydroxylase activity, cholecystokinin octapeptide (aqueous extracted) and somatostatin immunoreactivities and an increase in substance P immunoreactivity, may occur at later stages of the disease process.	1	6174877	1981
ABCB1	These findings led us to hypothesize that P-gp might be involved in the clearance of Abeta in normal aging and particularly in Alzheimer's disease (AD).	3	15975076	2004-05-01
	At this early stage, P-gp was upregulated in capillaries, suggesting a compensatory mechanism to increase Abeta clearance from the brain.		15975076	2004-05-01
	We hypothesize that Abeta clearance may be altered in individuals with diminished P-gp expression due, e.g., to genetic or environmental effects (such as drug administration).		15975076	2004-05-01
ICAM1	Our findings indicate that ICAM-1 accumulates in senile plaques as a complete 5-domain molecule at a relatively early stage of senile plaque formation	1	7904796	1994-01-01
TAC1	Further analyses of the data in relation to the severity of plaque formation suggest that alterations in other neurochemical activities including reductions in dopamine-beta-hydroxylase activity, cholecystokinin octapeptide (aqueous extracted) and somatostatin immunoreactivities and an increase in substance P immunoreactivity, may occur at later stages of the disease process.	1	6174877	1981
CYCS	Our results suggest that conversion from MCI to AD is associated with a marked elevated N200 latency at baseline and a high increase in cytochrome c levels during a relatively short period of time, and that both parameters could be possibly considered as candidate markers for the discrimination between MCI patients who convert to AD and those who remain stable.	1	19519309	2009-06-01
IL1B	As these patients are at higher risk of conversion to dementia, we propose that an increased serum IL-1beta level is a stage marker of the ongoing brain neurodegeneration in the continuum between normal ageing and AD.	1	19996595	2--9
IL10	IL-10 may partly explain the conversion of a-MCI to AD or be a genetic marker of susceptibility.	1	20798845	2010-07-01
TP53	Overall, the data provide evidence that p53 is involved in the neuronal death in both MCI and AD, suggesting that the observed alterations are early events in the progression of AD.	2	18494939	2008-06-01
	The focus of these studies was to measure the oxidation and nitration status of this important proapoptotic protein, consistent with the hypothesis that oxidative modification of p53 could be involved in the neuronal loss observed in neurodegenerative conditions.	1	18439434	2008-07-01
TNF	CD40 is a member of the tumor necrosis factor receptor super-family and has been suggested to play a role in the metabolism of beta-amyloid (Abeta) in Alzheimer's disease (AD).	2	18996438	2009-01-01
	Some of them, including Tumor Necrosis Factor-alpha, Interferon-gamma-inducible Protein-10, Monocyte Chemotactic Protein-1 and Interleukin-8, are increased in AD and in Mild Cognitive Impairment, considered the prodromal stage of AD, suggesting that these modifications occur very early during the development of the disease, possibly explaining the failure of trials with anti-inflammatory agents i…		21196374	2011-01-01
SYP	Synaptophysin and ChAT appear to be more vulnerable in severe AD than are syntaxin or SNAP-25.	1	11589423	2001-10-01
SLC30A4	Our previous studies demonstrate alterations of zinc (Zn) transporter proteins ZnT-1, ZnT-4 and ZnT-6 in vulnerable brain regions of subjects with mild cognitive impairment (MCI), and early and late stage Alzheimer's disease (AD), suggesting disruptions of Zn homeostasis may play a role in the pathogenesis of AD.	1	19371353	2010-03-01
IDE	Our findings suggest that reduction in NEP and IDE activity is not the primary cause of beta-amyloid accumulation in AD, but rather a late-stage phenomenon secondary to neurodegeneration.	1	19606063	2009-08-01
CACNA1C	Further studies should clarify which functional implications are associated with the higher availability of CaV1.2 channels in late stage Alzheimer's disease.	1	20413896	2--10
APOC1	The present study partially confirmed the previous findings, suggesting that the ApoCI A allele might contribute to the susceptibility to moderate to severe sporadic AD in Chinese.	1	14705977	2004-02-01
HSPG2	These results therefore suggest that perlecan persistence in A beta-amyloid deposits in late-stage AD may be primarily due to decreased perlecan degradation and removal.	1	8752120	1996-09-01
GLO1	Western Blot analysis indicates that in comparison to healthy controls, glyoxalase I protein amounts are 1.5-fold increased in early AD subjects and continuously decrease in middle and late stages of AD.	2	16427160	2007-01-01
	In conclusion, the decrease of glyoxalase I expression with increasing AD stage might be one reason for methylglyoxal-induced neuronal impairment, apoptosis, and AGE formation in plaques and tangles.		16427160	2007-01-01
GPHN	When samples were categorized on an index of pathological severity, gephyrin levels decreased with increasing severity until a moderate index was reached, and then increased, suggesting that higher gephyrin levels might compensate for excitotoxic damage in late stages of the disease.	1	18599957	2008-07-01
ADAM10	The data do not support the hypothesis that alteration of BACE and ADAM10 expression are associated with development of late stages of AD.	1	12438920	2002-11-01
EIF4E	These data suggest that the increase of eIF4E phosphorylation is involved in formation of Alzheimer neurofibrillary changes.	1	15371741	2004-10-01
TNFSF10	Our data indicate that TRAIL serum level decreases in the late stage of disease.	1	19294332	2009-06-01
HMOX1	These results suggest that HO-1-positive fibroblasts, but not HO-1-positive macrophages, are associated with the late stage of amyloid fibril formation.	1	15582941	2--4
CFTR	Reduced CFTR expression in the hypothalamus may represent an important mechanism by which AD neurodegeneration contributes to body wasting in the late stages of disease.	2	14757935	2003-12-01
	Since the hypothalamus is a late target of neurodegeneration in Alzheimer's disease (AD), we postulated that patients with end-stage AD and bodily wasting would have reduced levels of CFTR expression in the hypothalamus.		14757935	2003-12-01
Jun	The expression of differentially phosphorylated c-Jun in the AD brain may reflect the contradictory roles of these phosphorylation sites in neurons.	2	16481106	2006-05-01
	Furthermore, the inappropriate sequestration of phosphorylated c-Jun in tangles in AD brains may contribute to AD pathology and neurodegeneration		16481106	2006-05-01
NFATC2	The results suggest that NFAT signaling is selectively altered in AD and may play an important role in driving Abeta-mediated neurodegeneration.	1	19828810	2009-10-01
MTNR1A	Our study suggests that the MT1-mediated effects of melatonin on the SCN are disturbed during aging and even more so in late stage AD, which may contribute to the clinical circadian disorders and to the efficacy of therapeutic melatonin administration under these conditions.	1	16837102	2007-08-01
PRKCG	Thus, although protein levels of Calmyrin are low in human forebrain, its cellular localization as well as its altered distribution in AD brain suggest that it may be involved in the pathogenesis of AD.	1	15885068	2005-06-01
CASP3	The activation of proteins within the caspase family has been implicated in AD-associated neurodegeneration, and synaptically localized caspase activity could play a role in the synaptic degeneration and loss found in AD.	1	18818379	2008-11-01
IL6	Some years ago, a local acute phase reaction involving production of interleukin-1 (IL-1) and IL-6 was proposed as the triggering event in AD.	3	7904796	1994-01-01
	This observation suggests that IL-6 expression may precede neuritic changes and that in AD an immunological mechanism may be involved both in the transformation from diffuse to primitive plaques and in the development of dementia.		8793035	1996-06-01
	Based on several studies indicating that IL-6 expression is inducible also by psychological stress, one could speculate whether long-lasting stressful experiences may contribute to the pathological process underlying Alzheimer's disease.		8793035	1996-06-01
HSD17B4	The results indicate that a deficit in d-bifunctional protein activity impairs docosahexaenoic acid biosynthesis in liver of Alzheimer's disease patients, lessening the flux of this neuroprotective fatty acid to the brain.	1	20838618	2010-09-01
NTS	Taken together, our results provide the first quantitative evidence showing that ghrelin/NTS systems are markedly altered in the brain of AD patients, thereby suggesting that these systems may contribute to the severe cognitive deficit observed in this pathology.	1	20858966	2--10
ESR1	We hypothesized that estrogen receptor levels would be related to severity of cognitive impairment assessed proximate to death.	2	18288931	2008-02-01
	Together our data show a relationship between wild-type ER-alpha and level of cognitive impairment in AD, and also suggest the possibility that variant isoforms of ER-alpha may be present in frontal cortex of patients with and without AD.		18288931	2008-02-01
TGFB1	Furthermore, astrocytes could be reactivated by TGFβ1 to generate more Aβ and to undergo the aggravating astrogliosis. TGFβ2 was also observed to cooperate with Aβ to cause neuronal demise by destroying the stability of lysosomes in neurons.	1	21143158	2011-02-01
TNF	There is abundant evidence that inflammatory mechanisms within the central nervous system contribute to cognitive impairment via cytokine-mediated interactions between neurons and glial cells. Interleukins 1, 4, 6, 10, 12, 16, and 18, tumour necrosis factor, and several chemokines have been suggested as biomarkers of AD.	1	19828948	2--9
LCN2	We hypothesize that there may be a significant change in the plasma LCN2 levels in patients with MCI and AD when compared to nomral control subjects	2	21463871	2011-06-01
	Thus increased plasma LCN2 levels during MCI could be helpful in predicting the progression from MCI to AD		21463871	2011-06-01
SIRT1	our results indicate that loss of SIRT1 is closely associated with the accumulation of amyloid-beta and tau in the cerebral cortex of persons with AD.	2	19104446	2009-01-01
	Because sirtuins may increase the life span through regulation of cellular metabolism, we compared the concentration of sirtuin 1 (SIRT1) in the brains of AD patients (n = 19) and controls (n = 22) using Western immunoblots and in situ hybridization.		19104446	2009-01-01
BAG2	However, the site of triage and the master regulatory elements are unknown. Here, we report an elegant mechanism of Tau degradation involving the cochaperone BAG2. The BAG2/Hsp70 complex is tethered to the microtubule and this complex can capture and deliver Tau to the proteasome for ubiquitin-independent degradation.	1	19228967	2009-02-01
APH1B	The Aph1B complex contributes to total gamma-secretase activity in the human brain, and thus specific targeting of Aph1B-containing gamma-secretase complexes may help generate less toxic therapies for Alzheimer's disease.	1	19299585	2009-05-01
BCL2	These findings suggested that bcl2 is an important functional target for miR-34a, and the abnormal expression of miR-34a may contribute to the pathogenesis of Alzheimer's disease, at least in part by affecting the expression of bcl2.	1	19683563	2009-10-01
